# Supplementary material
Source: bioRxiv or medRxiv preprint supplement (https://www.biorxiv.org/highwire/filestream/103221/field_highwire_adjunct_files/1/337709-2.pdf)
Supplement: Supplementary file [file 337709-2.pdf]

## Appendix: Supplementary data

**Table 1. Primers used for cloning**

| Cloning vector     | Fragment/ gene | Primer name       | Primer sequence                         |
|--------------------|----------------|-------------------|-----------------------------------------|
| pART7/<br>pML-BART | SCR            | SCR-F:            | 5' CGCCGAAAACCCTAACGACTTTG 3'           |
|                    |                | SCR-R:            | 5' CGGTTTGGTAGTAGAAAAGCTAGACTCT 3'      |
|                    |                | NotI-SCR-F1:      | 5' AGCGGCCCGCCGAAAACCCTAAC 3'           |
|                    |                | XhoI-NotI-SCR-F1: | 5' AACTCGAGAGCGGCCCGCCGAAAAC 3'         |
|                    |                | KpnI-SCR-R1:      | 5' AAGGTACCGGTTTGGTAGTAGAAAAGCTAGACT 3' |
| pART7/<br>pML-BART | <i>LYK5</i>    | KpnI-LYK5-F:      | 5' AAGGTACCATGGCTGCGTGTACTCCA 3'        |
|                    |                | XbaI-LYK5-R:      | 5' GGTCTAGACTAGTTGCCAAGAGAGCCGGA 3'     |
| pART7/<br>pML-BART | <i>GFP</i>     | KpnI-GFP-F:       | 5' AAGGTACCGGATCCAAGGAGATATAACA 3'      |
|                    |                | XbaI-GFP-R:       | 5' GGTCTAGAGAGCTCTTAAAGCTCATCATG 3'     |

**Table 2. Primers used for gDNA PCR and qPCR**

| <b>Gene</b>      | <b>Primer name</b> | <b>Primer sequence</b>       |
|------------------|--------------------|------------------------------|
| <i>LYK5</i>      | gDNA-SCR-LYK5-F:   | 5' TGGACTTGGAGAAAGACATTCA 3' |
|                  | gDNA-SCR-LYK5-R:   | 5' CTGCCACATCCCCTTGCTATT 3'  |
| <i>LYK5</i>      | LP                 | 5' TTCTGGTCTCAACCACCGTAC 3'  |
|                  | RP                 | 5' CAGAAACCTGAGAGACGGATG 3'  |
|                  | LBb1.3             | 5' ATTTTGCCGATTTTCGGAAC 3'   |
| <i>GFP</i>       | gDNA-SCR-GFP-F:    | 5' TCATATTGAGCCGTGTGTTTG 3'  |
|                  | gDNA-SCR-GFP-R:    | 5' TCAAGGAATCTCACCCATGC 3'   |
| <i>LYK5</i>      | qPCR-LYK5-F:       | 5' CCGGGATCTTCTTCTTCTCA 3'   |
|                  | qPCR-LYK5-R:       | 5' GTCGTTGTTGTTGTGGGAAT 3'   |
| <i>WRKY29</i>    | qPCR-WRKY29-F:     | 5' ACCCGGAGAAATTCACCATA 3'   |
|                  | qPCR-WRKY29-R:     | 5' TTCTTGAACCGCAACAGAAG 3'   |
| <i>WRKY30</i>    | qPCR-WRKY30-F:     | 5' CGGTACAACAATGCCGATAC 3'   |
|                  | qPCR-WRKY30-R:     | 5' TTTGATCTCGCATTTGAAGC 3'   |
| <i>DIR5</i>      | qPCR-DIR5-F:       | 5' TTCTGCAGCAGTTACCAACC 3'   |
|                  | qPCR-DIR5-R:       | 5' TCCCTTTGTGTTGAGTCGAG 3'   |
| <i>AT2G21640</i> | qPCR-OXSTR-F:      | 5' GAAAATCGAAACCGAGAACC 3'   |
|                  | qPCR-OXSTR-R:      | 5' TGGAGAAGCTCCCGAATATC 3'   |
